# Supplementary material for: Wheat and Rice beyond Phenolic Acids: Genetics, Identification Database, Antioxidant Properties, and Potential Health Effects
Source: MDPI journal article supplement (doi:10.3390/plants11233283), 2022-11-29
Supplement: s1 [file s1]

# Wheat and rice beyond phenolic acids: Genetics, identification database, antioxidant properties, and potential health effects

Supplementary material

Table S1 - The content of soluble phenolic acids in rice using LC and MS-based methods

| Phenolic acid                   | Wild Rice <sup>[1]</sup> | Red rice <sup>[1]</sup> | White rice <sup>[1]</sup> | White <sup>[2]</sup> | Red <sup>[2]</sup> | Black <sup>[2]</sup> |
|---------------------------------|--------------------------|-------------------------|---------------------------|----------------------|--------------------|----------------------|
|                                 | µg/g                     | µg/g                    | µg/g                      | mg/100g              | mg/100g            | mg/100g              |
| <i>p</i> -Hydroxybenzaldehyde   | 12.1 - 15.6              | nd                      | nd                        |                      |                    |                      |
| <i>p</i> -Hydroxybenzoic acid   | 7.1 - 11.1               | nd                      | 0.8                       |                      |                    |                      |
| trans-Cinnamic acid             | 5.49                     | 5.27                    |                           |                      |                    |                      |
| Vanillin                        | 13.0 - 22.3              | 1.0                     | nd                        |                      |                    |                      |
| Protocatechuic acid             | 12.9 - 15.6              | 7.8                     | nd                        | nd                   | nd                 | 4.45                 |
| <i>p</i> -Coumaric acid         | 6.7 - 7.0                | 1.1                     | 1.2                       | 0.40                 | 0.39               | 0.63                 |
| <i>o</i> -Coumaric acid         | 2.9 - 10.0               | nd                      | nd                        |                      |                    |                      |
| Vanillic acid                   | 6.3 - 17.8               | nd                      | 1.3                       | nd                   | nd                 | 4.48                 |
| Gallic acid                     | 64.6 - 167.1             | 1.1                     | 0.2                       |                      |                    |                      |
| Protocatechuic acid ethyl ester | 2.0 - 6.1                | nd                      | nd                        |                      |                    |                      |
| Ferulic acid                    | 121.1 - 189.7            | 12.4                    | 10.9                      | 1.11                 | 1.60               | 2.07                 |
| Isoferulic acid                 |                          |                         |                           | 0.40                 | 0.41               | 1.16                 |
| Syringic acid                   | 5.1 - 19.5               | nd                      | 0.9                       | 1.08                 | 0.81               | nd                   |
| Sinapic acid                    | 26.8 - 59.4              | 3.2                     | 4.6                       | nd                   | 0.98               | 0.58                 |

Abbreviations: nd, non-detected.

Table S2 - The content of soluble flavonoids and proanthocyanidins in rice using LC and MS-based methods

| Flavonoid/Proanthocyanidin | Wild Rice <sup>[1]</sup> | Red rice <sup>[1]</sup> | White rice <sup>[1]</sup> |                                          | Yellow rice <sup>[3]</sup> | Red rice <sup>[4]</sup> |
|----------------------------|--------------------------|-------------------------|---------------------------|------------------------------------------|----------------------------|-------------------------|
|                            | μg/g                     | μg/g                    | μg/g                      |                                          | mg/g                       | μg/g                    |
| Catechin                   | 15.6 - 21.3              | 6.6                     | nd                        | Isoorientin 2''-O- glucoside             | 27.46                      |                         |
| Epicatechin                | 24.3 - 43.3              | 3.5                     | nd                        | Luteolin 6-C-glucoside (Isoorientin)     | 62.46                      |                         |
| Quercetin                  | 15.4 - 44.1              | 16.6                    | nd                        | Vitexin 2''-O-glucoside                  | 19.65                      |                         |
| Epigallocatechin           | 7.5 - 10.0               | nd                      | nd                        | Apigenin 6-C-glucoside (Isovitexin)      | 13.20                      |                         |
| Procyanidin B1             | 10.2 - 13.0              | 7.0                     | nd                        | Isoscoparin 2''-O- glucoside             | 22.40                      |                         |
| Procyanidin B2             | 5.0 - 5.5                | 2.4                     | nd                        | Chrysoeriol 6-C- glucoside (Isoscoparin) | 13.66                      |                         |
| Procyanidin B3             | 6.3 - 9.4                | 3.4                     | nd                        |                                          |                            |                         |
| Procyanidin C1             | 17.0 - 24.2              | 6.0                     | nd                        | Cyanidin 3-O-glucoside                   |                            | 55.95                   |
| Rutin                      | 83.6 - 103.7             | 20.8                    | 15.7                      | Peonidin 3-O-glucoside                   |                            | 16.46                   |

Abbreviations: nd, non-detected.

Table S3 - The content of insoluble-bound phenolics in rice using LC or LC/MS-based methods

| <b>Phenolic acids</b> | <b>White<sup>[2]</sup></b> | <b>White<sup>[4]</sup></b> | <b>Red<sup>[2]</sup></b> | <b>Red<sup>[4]</sup></b> | <b>Black<sup>[2]</sup></b> | <b>Black<sup>[4]</sup></b> |
|-----------------------|----------------------------|----------------------------|--------------------------|--------------------------|----------------------------|----------------------------|
|                       | <b>mg/100g</b>             | <b>mg/100g</b>             | <b>mg/100g</b>           | <b>mg/100g</b>           | <b>mg/100g</b>             | <b>mg/100g</b>             |
| Protocatechuic acid   | nd                         | nd                         | 0.15                     | 1.26                     | 0.76                       | 4.48                       |
| p-Hydroxybenzoic acid | nd                         | nr                         | nd                       | nr                       | nd                         | nr                         |
| Vanillic acid         | nd                         | nd                         | nd                       | nd                       | 4.87                       | 5.38                       |
| Syringic acid         | 0.61                       | 0.60                       | 0.50                     | 0.52                     | 0.67                       | 0.63                       |
| p-Coumaric acid       | 2.68                       | 1.36                       | 1.83                     | 1.05                     | 2.06                       | 2.00                       |
| Ferulic acid          | 7.79                       | 4.28                       | 7.74                     | 5.73                     | 18.57                      | 17.92                      |
| Isoferulic acid       | 1.20                       | 1.59                       | 0.80                     | 1.29                     | 1.04                       | 1.33                       |
| Sinapic acid          | nd                         | nr                         | nd                       | nr                       | 0.39                       | Nr                         |

Abbreviations: nd, non-detected; nr, non-reported.

Table S4 - The content of soluble phenolic acids and flavonoids in wheat using LC and MS-based methods

| Phenolic acids                  | Old wheat[5] | Modern durum wheat[5] | Common wheat[6] | Durum wheat[7] | Common wheat [7] | Anthocyanins               | Purple wheat [8] |
|---------------------------------|--------------|-----------------------|-----------------|----------------|------------------|----------------------------|------------------|
|                                 | µg/g         | µg/g                  | mg/kg           | µg/g           | µg/g             |                            | mg/kg            |
| p-Hydroxybenzaldehyde           | 0.068        | 0.033                 |                 |                | 0.43             | Delphinidin 3-galactoside  | 38.3             |
| p-Hydroxybenzoic acid           |              |                       | 7.4             | 0.47           |                  | Delphinidin 3-arabinoside  | 16.7             |
| trans-Cinnamic acid             |              |                       |                 | 0.60           | 0.91             | Cyanidin 3-arabinose       | 25.1             |
| Vanillin                        | 0.284        | 0.088                 |                 |                |                  | Petunidin 3-galactoside    | 40.4             |
| Protocatechuic acid             |              |                       | nd              | nd             | nd               | Cyanidin 3-galactoside     | 72.0             |
| p-Coumaric acid                 | 1.704        | 0.666                 | 37              | 0.51           | 0.53             | Cyanidin 3-glucoside       | 103.0            |
| o-Coumaric acid                 |              |                       |                 |                |                  | Pelargonidin 3-glucoside   | 28.8             |
| Vanillic acid                   |              |                       | 15              | 0.44           | 1.21             | Peonidin 3-glucoside       | 2.7              |
| Gallic acid                     |              |                       |                 | 0.48           | 0.54             | Malvidin 3-glucoside       | 51.6             |
| Caffeic acid                    |              |                       | 37              | 0.52           |                  | Cyanidin chloride          | 5.2              |
| Protocatechuic acid ethyl ester |              |                       |                 |                |                  | Pelargonidin 3-galactoside | 26.1             |
| Protocatechuic acid ethyl ester |              |                       |                 |                |                  | Pelargonidin 3-arabinoside | 9.3              |
| Syringaldehyde                  | 0.632        | 0.399                 |                 |                |                  | Peonidin 3-arabinoside     | 28.4             |
| Ferulic acid                    | 126.00       | 61.54                 | 890             |                |                  |                            |                  |
| Isoferulic acid                 |              |                       |                 |                |                  |                            |                  |
| Syringic acid                   |              |                       | 13              |                |                  |                            |                  |
| Sinapic acid                    |              |                       | 63              |                |                  |                            |                  |

Abbreviations: nd, non-detected.

Table S5 - The content of insoluble-bound phenolic acids and flavonoids in wheat using LC and MS-based methods

|                           | <b>Durum wheat</b><br>[7] | <b>Common wheat</b><br>[7] | <b>Fine bran</b><br><b>µg/g</b> [9] | <b>Coarse bran</b><br><b>µg/g</b> [9] | <b>Flour</b><br><b>µg/g</b> [9] |
|---------------------------|---------------------------|----------------------------|-------------------------------------|---------------------------------------|---------------------------------|
| <b>Phenolic compounds</b> |                           | <b>µg/g</b>                |                                     |                                       |                                 |
|                           | <b>µg/g</b>               |                            |                                     |                                       |                                 |
| p-Hydroxybenzoic acid     | 4.42                      | 4.74                       | 1.68                                | 1.52                                  |                                 |
| trans-Cinnamic acid       | 5.49                      | 5.27                       |                                     |                                       |                                 |
| Vanillin                  |                           |                            | 0.65                                | 0.61                                  |                                 |
| p-Coumaric acid           | 11.81                     | 13.94                      | 9.24                                | 8.05                                  | 0.51                            |
| Vanillic acid             | 2.95                      | 2.97                       | 0.69                                | 0.79                                  | 0.15                            |
| Gallic acid               | 6.04                      | 5.95                       | 7.25                                | 6.52                                  |                                 |
|                           |                           |                            |                                     |                                       |                                 |
| Ferulic acid              | 216.38                    | 253.15                     | 279                                 | 218                                   | 12.1                            |
|                           |                           |                            | 25.6                                | 27.1                                  | 4.13                            |
| Σ DFA + TFA               |                           |                            | 56.6                                | 39.5                                  | 2.48                            |
| Syringic acid             | 2.94                      | 3.70                       | 1.64                                | 1.48                                  |                                 |
| Sinapic acid              | 41.29                     | 45.54                      | 7.76                                | 9.42                                  | 0.18                            |

Abbreviations: DFA: dehydrodiferulic acid; TFA: dehydrotriferulic acid.

## References:

1. Chu, M.J.; Liu, X.M.; Yan, N.; Wang, F.Z.; Du, Y.M.; Zhang, Z.F. Partial Purification, Identification, and Quantitation of Antioxidants from Wild Rice (*Zizania latifolia*). *Molecules* 2018, 23, doi:10.3390/molecules23112782.
2. Shao, Y.F.; Xu, F.F.; Sun, X.; Bao, J.S.; Beta, T. Identification and quantification of phenolic acids and anthocyanins as antioxidants in bran, embryo and endosperm of white, red and black rice kernels (*Oryza sativa* L.). *Journal of Cereal Science* 2014, 59, 211-218, doi:10.1016/j.jcs.2014.01.004.
3. Kim, B.; Woo, S.; Kim, M.J.; Kwon, S.W.; Lee, J.; Sung, S.H.; Koh, H.J. Identification and quantification of flavonoids in yellow grain mutant of rice (*Oryza sativa* L.). *Food Chemistry* 2018, 241, 154-162, doi:10.1016/j.foodchem.2017.08.089.
4. Shao, Y.; Xu, F.; Sun, X.; Bao, J.; Beta, T. Phenolic acids, anthocyanins, and antioxidant capacity in rice (*Oryza sativa* L.) grains at four stages of development after flowering. *Food Chemistry* 2014, 143, 90-96, doi:https://doi.org/10.1016/j.foodchem.2013.07.042.
5. Di Loreto, A.; Bosi, S.; Montero, L.; Bregola, V.; Marotti, I.; Sferrazza, R.E.; Dinelli, G.; Herrero, M.; Cifuentes, A. Determination of phenolic compounds in ancient and modern durum wheat genotypes. *ELECTROPHORESIS* 2018, 39, 2001-2010, doi:10.1002/elps.201700439.
6. Mattila, P.; Pihlava, J.M.; Hellstrom, J. Contents of phenolic acids, alkyl- and alkenylresorcinols, and avenanthramides in commercial grain products. *Journal of Agricultural and Food Chemistry* 2005, 53, 8290-8295, doi:10.1021/jf051437z.
7. Irakli, M.N.; Samanidou, V.F.; Biliaderis, C.G.; Papadoyannis, I.N. Development and validation of an HPLC-method for determination of free and bound phenolic acids in cereals after solid-phase extraction. *Food Chemistry* 2012, 134, 1624-1632.
8. Hosseinian, F.S.; Li, W.; Beta, T. Measurement of anthocyanins and other phytochemicals in purple wheat. *Food Chemistry* 2008, 109, 916-924.
9. Bueno-Herrera, M.; Pérez-Magariño, S. Validation of an extraction method for the quantification of soluble free and insoluble bound phenolic compounds in wheat by HPLC-DAD. *Journal of Cereal Science* 2020, 93, 102984.
